# Supplementary material
Source: Copernicus journal article supplement (doi:10.5194/egusphere-2024-1020)
Supplement: Supplementary file [file egusphere-2024-1020-AC3-supplement.pdf]

### RC3: Quentin Libois

Review of « The pitfalls of ignoring topography in snow retrievals: a case study with EMIT », by Niklas Bohn et al. Review by Quentin Libois.

#### General comments

This paper presents a novel retrieval algorithm based on optimal estimation to retrieve snow properties (grain size, dust and algae contents, liquid water content) from hyperspectral satellite images in the solar spectrum. The main originality of the algorithm is to account for local topography by including the slope angle in the retrieved parameters. The algorithm is applied to two images acquired above Patagonia by the spaceborne instrument EMIT. Accounting for the local slope has a significant impact of the dust and grain size retrievals, but is less critical for algae and liquid water content which are characterized by localized spectral features. These retrievals are also used to compute the instantaneous radiative forcing of light absorbing particles, which is also very sensitive to slope effects. The spatial gradients of the retrieved quantities are discussed on a physical basis, supporting the reliability of the retrievals. A preliminary sensitivity study is performed, which highlights how the aerosol optical depth in the atmosphere and the slope angle impact the snow reflectance. The apparent drop in the blue range of snow spectra is discussed in details to highlight that topography is largely responsible for this common feature of snow reflectance as measured from space. Some limitations of the current algorithm and suggestions for improvements are also provided.

The paper is overall well written, although the abstract and introduction could probably be greatly improved, in particular to better remind the existing strategies already used to account for topography in snow retrievals from space and the link between the present work and previous studies from the same authors. More technical information about EMIT would be appreciated and the relevance of the retrieval algorithm to other spaceborne instruments could be elaborated. Some technical details lack in the presentation of the algorithm but could easily be provided. My main concern is about the representation of snow by a collection of spheres to simulate the directional reflectance. This issue is only very briefly mentioned in the discussion, without any quantification of the potential impacts. It certainly deserves much more attention. Also, the accuracy of the retrievals is not discussed, while the theoretical framework used would make it easy to investigate, and would strengthen the conclusion that retrievals of LAP are possible with EMIT while they were apparently challenging with previous spaceborne instruments. For these reasons I recommend that these points be carefully treated before the paper can be considered for publication.

We thank Dr. Libois for the positive feedback and the very constructive review. We significantly revised the manuscript by

1. Shortening and improving the abstract.
2. Clarifying objectives and novelty of the study as well as providing more context to existing literature in the introduction.
3. Providing more technical information about the EMIT instrument.
4. Enhancing the description of our retrieval algorithm.
5. Expanding the discussion about the modeling of snow grain shape and ice optical properties.
6. Adding posterior uncertainties and error correlation coefficients for the retrieved state vector parameters, obtained from the optimal estimation framework

Below, we address both specific and line-by-line comments by providing respective responses and by indicating the changes to the manuscript.

### Specific comments

1) The abstract is probably too long. It could more efficiently start with the relevance of monitoring LAP and grain size. Also the objective is not clearly stated, neither the main novelty compared to previous work. In general it is not very clear and would deserve some general rewriting (see some suggestions in the technical comments).

Thanks for this comment! We shortened the abstract and provide a more efficient description of the relevance of monitoring LAP and grain size at the beginning:

*“Global patterns of snow darkening and melting, induced by grain metamorphism and the accumulation of small light-absorbing particles (LAPs), such as mineral dust, black carbon, volcanic ash, or algae cells, lead to an intensified radiative forcing and retreat of Earth's snow cover. Mapping and quantifying snow grain size and LAPs on both temporal and spatial scales is needed to improve the prediction of melt rates and their impacts on climate change.”*

We also state both the objective and the novelty of our study more clearly now:

*“Accurate retrievals of snow surface properties, including grain size, liquid water content, as well as concentration of mineral dust and algae, require a precise, ideally joint accounting for atmospheric, topographic, and anisotropic effects in the reflected radiance. However, previous methods either neglect physical effects of the surface or utilize the surface reflectance as an intermediate non-physical quantity, in part without proper error propagation from the atmospheric modeling and obtained from statistical modeling. In this contribution, we present a novel surface-atmosphere radiative transfer model that couples the MODTRAN code with a physics-based snow surface reflectance model that utilizes the multistream DISORT program. Our model allows to omit the intermediate retrieval of surface reflectance, and to estimate snow surface and atmosphere properties directly from measured radiance.”*

2) The introduction as well could notably be improved. What is mainly missing is information about algorithms already used for LAP retrieval, and to account for topography (e.g. Picard et al., 2020). EMIT is selected because it supposedly has a larger SNR so what would happen if existing algorithms were applied to EMIT? Why such a motivation to build a new retrieval algorithm? This should be better motivated. Also, how does this study complement recent previous work from the same authors?

Algorithms used for LAP retrieval are already mentioned in the introduction (Painter et al., 2013a; Seidel et al., 2016; Bohn et al., 2021, 2022), but we added references to already existing snow algorithms that account for topography (Picard et al., 2020; Donahue et al., 2023):

*“Specifically, Picard et al. (2020) demonstrated the sensitivity of snow albedo measurements to surface slope based on spectral data taken in the field, and proposed a correction approach to retrieve the intrinsic albedo. Using a digital elevation model (DEM), this local geometry, including surface slope and aspect, can be calculated and incorporated in atmospheric modeling schemes in order to correct for spectral distortions in the retrieved surface reflectance (Richter and Schläpfer, 2017). However, given the complex terrain of mountainous*

*regions, and the current unavailability of coincident radar/lidar and imaging spectroscopy data in orbit, reliance on fixed DEMs may introduce additional retrieval errors, not only due to variability in local snow depth, but also because of uncertainties in the DEM product itself (Dozier et al., 2022). For instance, Donahue et al. (2023) showed that topographic correction with coarse and non-coincident DEMs introduces significant errors in estimated snow albedo from air- or spaceborne imaging spectroscopy of up to 20 %. Overall, a mature and comprehensive modeling of topography for spaceborne imaging spectroscopy data over mountain snow has not yet been demonstrated, and only a few studies have applied a limited post-hoc correction at the airborne scale (Painter et al., 2013a; Seidel et al., 2016)."*

The motivation to build a new retrieval algorithm is not specifically driven by the selection of the EMIT instrument, although it indeed provides a very convincing SNR and data quality in general (see Thompson et al. (2024)). Our study is rather motivated by the need to include more comprehensive physics in the forward model and to circumvent the retrieval of surface reflectance as a non-physical, intermediate quantity. In fact, our proposed algorithm could be applied to any available spaceborne imaging spectrometer, e.g., to EnMAP and PRISMA as well. We tried to provide a better motivation and a more reasonable connection to our previous work:

*"Recent work has demonstrated that a simultaneous inversion of atmosphere and surface state using optimal estimation (OE) shows promising potential to quantify even low concentrations of LAPs on a global scale from spaceborne imaging spectroscopy observations (Bohn et al., 2021, 2022). However, the approach utilizes the surface reflectance as an intermediate non-physical retrieval quantity assuming Lambertian behavior. It is obtained from statistical modeling using constrained priors, impeding a proper consideration of surface topography and anisotropy. This could lead to significant biases in downstream estimates of LAP concentration, and propagate to erroneous calculations of LAP radiative forcing as these physical effects influence both magnitude and shape of measured spectral radiance as a function of local view and solar geometry (Carmon et al., 2022, 2023). [...] To improve the downstream estimation of biogeophysical quantities, we need to align the surface and atmospheric forward modeling assumptions. In particular, the retrieval of properties on highly anisotropic surfaces such as snow and ice will benefit from capturing local topographic conditions through physical modeling as directional effects are minimized. We present an updated version of the algorithm that was originally introduced by Thompson et al. (2018) and modified by Bohn et al. (2021). It simultaneously retrieves atmosphere and surface properties from imaging spectrometer measurements by inverting a wavelength-dependent top-of-atmosphere (TOA) radiance model. In this work, we introduce a full physics-based characterization of atmosphere and surface by coupling the MODTRAN atmosphere radiative transfer code with the multistream DISORT program. The latter is utilized to simulate directional snow reflectance as a function of biogeophysical properties as well as view and illumination geometry. This facilitates the consideration of local surface anisotropy and topography in the forward model and removes dependency from external DEMs (Carmon et al., 2023). Aim is to utilize this best in class physical and atmospheric modeling simultaneously to present estimations of snow surface properties directly from measured radiance."*

3) EMIT is central in the present study. However it is nowhere described in details. In particular information on the spatial resolution (which is very critical) is lacking. Likewise, information about its spectral resolution and radiometric accuracy would be very useful. An important question being: why using EMIT and not any other spaceborne hyperspectral (or multi-spectral if it would be enough for the purpose of the study) sensor.

Good point! A more detailed description of the EMIT instrument was indeed missing, so we revised:

*“EMIT is a high performance VNIR-SWIR imaging spectrometer whose prime mission focus is to deliver maps of surface mineralogy and relative abundance of different mineral types from arid dust source regions. These maps will provide improved input to Earth System Models of atmospheric transport and radiative forcing by constraining the composition of regional dust emissions (Connelly et al., 2021). Extending over a wavelength range of 380-2500 nm with a spectral resolution of approximately 7.5 nm, EMIT images provide a pixel size of around 60 m on a 74 km wide swath. The temporal revisit time is variable depending on the orbital cycle of the ISS, and ranges between one day and more than a week (Thompson et al., 2024). After more than a year in operation, EMIT provides data products from many different regions of the Earth, including snow covered high mountains, and experiments have confirmed a remarkably high SNR of more than 500 on average and above 750 in the VNIR wavelengths (Thompson et al., 2024).”*

The selection of EMIT for our study was primarily driven by its convincing performance with respect to SNR and overall data quality, but also simply because it was built at JPL and thus, represents an ‘in-house’ instrument. Again, our proposed algorithm could be applied to any other available spaceborne imaging spectrometer, for instance, to EnMAP or PRISMA.

4) The authors represent snow as a collection of spheres, although it has been known for a long time that this is not appropriate, in particular to describe the anisotropy of snow reflectance. The quantitative impact of such an assumption on the retrievals is not investigated, which is detrimental to the overall quality and impact of the study. I’d encourage the authors to test the retrievals with other datasets of snow directional reflectance (from observations or models depending on the availability of the data, see some suggestions in the technical comments). Also, adding a figure to illustrate the snow HDRF used in the forward model would probably help the interpretation of the spectra and their sensitivity to illumination and viewing geometry

We understand and agree that assuming spherical particles for snow might be inappropriate. We follow the approach of Grenfell and Warren (1999) and model non-spherical snow particles by a collection of independent spheres that has the same volume-to-surface-area ratio as the non-spherical particles. Several studies have shown that this approach provides an accurate representation of extinction efficiency and single-scattering albedo, while only the scattering asymmetry factor is usually overestimated (Grenfell and Warren, 1999; Neshyba et al., 2003; Grenfell et al., 2005; Warren, 2019). Its effect on bulk optical properties can be compensated though by reducing the grain size of the model (Dang et al., 2016). Nevertheless, more realistic snow directional reflectance datasets certainly exist, but we would like to defer the testing of various representations of snow and ice optical properties in our retrieval framework to a subsequent study. We consider the current manuscript rather as a concept study for the simultaneous retrieval of atmosphere and physical surface properties directly from at-sensor radiance. In fact, we changed and adjusted both title and narrative of the manuscript, following the suggestions of reviewer #2. In any case, we extended the discussion in Section 5.2:

*“We apply Mie scattering theory to obtain the ice OPs, and follow the approach of Grenfell and Warren (1999) to model non-spherical snow particles by a collection of independent spheres that has the same volume-to-surface-area ratio as the non-spherical particles. This assumption might be inappropriate, but studies have shown that this approach provides an*

accurate representation of extinction efficiency and single-scattering albedo, while only the scattering asymmetry factor is usually overestimated (Grenfell and Warren, 1999; Neshyba et al., 2003; Grenfell et al., 2005; Warren, 2019). Its effect on bulk optical properties can be compensated though by reducing the grain size of the model (Dang et al., 2016). Nevertheless, more accurate representations of the optical shape of snow as well as more realistic snow BRDF datasets certainly exist (e.g., see Malinka (2014), Dumont et al. (2021), Malinka (2023)), but we would like to defer the testing of various representations of snow and ice optical properties in our retrieval framework to a subsequent study. We consider the current manuscript rather as a concept study for the simultaneous retrieval of atmosphere and physical surface properties directly from at-sensor radiance. However, we have to be aware of potential misrepresentations in many cases. For instance, the glacier outflows from the Chilean ice field are likely not well represented by applying Mie theory. The grains on bare ice surfaces typically appear to be arbitrarily shaped with irregular dimensions, so that, e.g., a Geometric Optics approach based on ray-tracing would be more appropriate to model their OPs (Kokhanovsky and Zege, 2004; Cook et al., 2020; Bohn et al., 2022). In future work, we need to compare retrieval results from assuming different grain shapes, including spheres, spheroids, hexagonal plates, and Koch snowflakes (He et al., 2017; Hao et al., 2023). We will also apply different approaches to model ice layers, e.g., with enclosed air bubbles and a Fresnel layer between the ice and a thin snow cover (Whicker et al., 2022).”

We actually provide a figure of snow HDRF used in the forward model in the initial submission of our manuscript. Figure 1 highlights the sensitivity of snow HDRF to variations in solar zenith angles for different grain sizes. In addition, Figure 2 depicts changes in snow HDRF with varying ratios of direct to diffuse illumination.

5) I feel like some technical details in the algorithm are missing. First, the equation for the forward model would deserve more physical explanations, beyond a reference to a paper. Then, snow grain size is not properly defined. Is it a radius, a diameter, averaged or effective over a prescribed size distribution, or on the contrary a monodisperse collection? As a consequence, the way liquid water content is accounted for is not sufficiently clear. Likewise it is not clear if the treatment of LAP relies on mass absorption coefficients or any other optical quantity. The instrumental noise is not detailed either while some quantitative information to highlight the high SNR would be appreciated.

Thanks for this comment! We added a comprehensive explanation of the physical quantities in our forward model:

“ $I_0$  is the atmospheric path radiance, i.e., the number of solar photons that are scattered by the atmosphere into the line-of-sight of the sensor without interaction with the surface.  $t^{\downarrow}_{dir}$ ,  $t^{\downarrow}_{dif}$ , and  $t^{\uparrow}$  are direct downwelling, diffuse downwelling, and total upwelling transmittance of the atmosphere. Scaled by two different angles,  $t^{\downarrow}_{dir}$  and  $t^{\downarrow}_{dif}$  represent the partition into direct and diffuse irradiance at the surface. Finally,  $s$  is the spherical albedo of the atmosphere, which describes the multiple scattering of photons between the target pixel and the surrounding atmosphere before they enter the line-of-sight of the sensor.”

Next, we revised the definition of snow grain size and liquid water content:

“We assume the snow grains to be shaped as a collection of spheres characterized by a specified radius that equals three times the volume-to-area ratio of the real non-spherical snowpack (Warren, 2019), and apply traditional Mie Theory to obtain their OPs (Grenfell and

Warren, 1999). [...] We add the influence of liquid water by modeling OPs of coated spheres for the case of wet snow by adding the width of a circular layer of liquid water to the grain radius (Green et al., 2002).”

We use single-scattering albedo, mass extinction coefficient, and asymmetry parameter as optical properties for LAPs. Essentially, they are the same as for the snow particles and we model the LAP-contaminated snow as a linear mixture of all OPs, as we’ve mentioned in lines 197-198 and 208 of the initial manuscript submission.

Finally, we added specific numbers for the high SNR of EMIT measurements:

“After more than a year in operation, EMIT provides data products from many different regions of the Earth, including snow covered high mountains, and experiments have confirmed a remarkably high SNR of more than 500 on average and above 750 in the VNIR wavelengths (Thompson et al., 2024).”

6) One originality of the retrieval algorithm is to use the optimal estimation in combination with a forward model to retrieve the parameters of a state vector (instead of retrieving for instance reflectances). However only the most probable solutions of the problems are presented, without any reference to the associated uncertainties. Given that the objective of the study is to demonstrate that EMIT can be used to retrieve snow properties that are not accessible with other instruments, mentioning uncertainties is key to convince the reader that the retrieved quantities are reliable, in particular given that there is no ground truth. For instance it is quite questioning that the retrieved dust quantities can be strictly zero (Table 2). Beyond the uncertainties I’d encourage the authors to further investigate the correlations between the retrieved parameters, which could help understand how compensation between variables can affect the quality of the retrievals.

That’s a very good point! We absolutely agree that providing posterior uncertainties is one of the main advantages of optimal estimation. Our initial submission was more focused on the dependency of the retrieved parameters on topographic and anisotropic effects of the surface than on error estimates given by our OE inversion setup. However, we followed Dr. Libois’ suggestion and added the posterior uncertainties, i.e., the square-root of the variance, to each retrieved parameter value in Table 2, and briefly discuss the numbers in a new paragraph:

“Table 2 also shows posterior uncertainties for each retrieved parameter in standard deviation as reported by the OE framework. Errors are generally low, in particular for quantities exhibiting distinct absorption features in the reflectance spectrum, such as water vapor, grain size, or algae. Higher uncertainties are reported especially for AOD, but also for retrieved dust concentration. It has to be noted though that the linearized posterior error predictions by OE are likely optimistic. OE presumes a linearized version of the forward model, with a local multivariate Gaussian error prediction. This ignores other local minima solutions, if they exist, and even the local estimate may under predict errors (Hobbs et al., 2017; Cressie, 2018). However, the uncertainty estimates provide at least a useful hint whether the variance of retrieved values is reasonable or not.”

Likewise, we consent to Dr. Libois’ comment that an investigation of the correlations between retrieved parameters is crucial. We calculated the error covariance matrix for the retrieved parameters from the image of the Chilean ice field following Govaerts et al. (2010), and added this result to Section 4.2.2 as Figure 9, including a new paragraph:

*“Another way of assessing the sensitivity of retrieved parameters is to look at their error correlation. OE provides a measure of retrieval uncertainty for each state vector element in terms of a posterior covariance matrix, which can be normalized to an error correlation matrix (Rodgers, 2000; Govaerts et al., 2010). We calculated this matrix from the retrieval maps for the Chilean ice field for both atmosphere and surface properties (Fig. 9). The coefficients confirm the findings from Fig. 8 by showing a slight negative correlation between  $\theta_i$  and grain size, a slight positive correlation between  $\theta_i$  and dust, and no correlations between the assumed incident angle and both liquid water and algae. We observe expected anticorrelation between pressure elevation and both AOD and water vapor, and identify an overall disentanglement between surface and atmosphere parameters. Only exceptions are  $\theta_i$ , being an input to both atmosphere and surface model, and AOD, which features a negative correlation with dust LAPs.  $\theta_i$ , or more precisely, the assumed ratio of direct to diffuse irradiance, dust, and atmospheric aerosols cause a very similar shape of reflectance in the visible wavelengths, leading to potential ambiguities between them.”*

In addition, we added some of these findings to Section 4.2.4 about the blue wavelengths:

*“Our selection of AOD for the comparison is supported by the findings from Fig. 9, which show a negative correlation between AOD and both  $\theta_i$  and dust. In other words, the retrieval could bare the risk of compensating for a biased AOD by altering the other two parameters and vice versa.”*

And:

*“In contrast, variations in AOD can not compensate for erroneously assumed  $\theta_i$ , which supports the conclusion that the anticorrelation between the two properties is rather one-sided, and a correct assumption or retrieval of the incident angle is more important than a proper characterization of atmospheric aerosols.”*

## **Technical comments**

### **1.2: solar radiation would be better than illumination**

To shorten our abstract, we removed the respective sentence.

### **1.3: at negative temperature melting is not critical, but metamorphism is**

To shorten our abstract, we removed the respective sentence, but added grain metamorphism as cause for snow melting:

*“Global patterns of snow darkening and melting, induced by grain metamorphism and the accumulation of small light-absorbing particles (LAPs), such as mineral dust, black carbon, volcanic ash, or algae cells, lead to an intensified radiative forcing and retreat of Earth's snow cover.”*

### **1.6: maybe specify LAPs on/in snow?**

Yes, we added a list of more specific LAPs:

*Global patterns of snow darkening and melting, induced by grain metamorphism and the accumulation of small light-absorbing particles (LAPs), such as mineral dust, black carbon, volcanic ash, or algae cells, lead to an intensified radiative forcing and retreat of Earth's snow cover.”*

#### **I.11: not clear what dust properties EMIT measures**

EMIT does not measure dust properties directly, but solar radiation reflected from Earth's surface. By removing atmospheric effects, we obtain characteristic surface reflectance, which is then used as input to a retrieval of mineralogy and relative abundance for different mineral types. We revised by removing the information about the prime mission focus as we believe that it is not relevant in the abstract and clarified which type of measurement imaging spectrometers such as EMIT provide:

*“This technology provides measurements of reflected solar radiation in continuous spectral channels throughout the solar spectrum, allowing to detect narrow LAP absorption bands.”*

#### **I.12: what is a “target mask”?**

EMIT's target mask indicates the coverage of observations. EMIT is not collecting data for every location on its orbit, but only if it is within the predefined target mask. We removed this term in order to avoid any confusion:

*“EMIT observations include snow cover in low to mid-latitude mountainous regions, such as the Western US, the Andes in South America, or high-mountain Asia.”*

#### **I.15: anisotropy of what?**

We mean the anisotropy of the snow surface and clarified the phrase:

*“Accurate retrievals of snow surface properties, including grain size, liquid water content, as well as concentration of mineral dust and algae, require a precise, ideally joint accounting for atmospheric, topographic, and anisotropic effects in the reflected radiance.”*

#### **I.16: why “forward scattering”? Not clear**

We removed this term for clarity.

#### **I.18-20: quite difficult to understand in an abstract**

We agree and revised our statement for more clarity:

*“In this contribution, we present a novel surface-atmosphere radiative transfer model that couples the MODTRAN code with a physics-based snow surface reflectance model that utilizes the multistream DISORT program. Our model allows to omit the intermediate retrieval of surface reflectance, and to estimate snow surface and atmosphere properties directly from measured radiance.”*

#### **I.21: it would have been helpful to detail earlier (e.g. I.15) what are the snow properties to be retrieved**



Fully agreed! We added this detail:

*“Accurate retrievals of snow surface properties, including grain size, liquid water content, as well as concentration of mineral dust and algae, require a precise, ideally joint accounting for atmospheric, topographic, and anisotropic effects in the reflected radiance.”*

1.22: use  $\mu\text{g g}^{-1}$  instead, as well as for all units

Revised throughout the manuscript!

1.23: such a forcing seems huge! It’s because it’s instantaneous.

Yes, that’s right. We added the word “instantaneous”:

*“Furthermore, we demonstrate differences in instantaneous LAP radiative forcing of up to  $400 \text{ Wm}^{-2}$  in cases of LAP concentration inaccurately quantified from surface reflectance”*

1.25: is the “blue hook” something sufficiently well known (it is not to me) to appear as is in an abstract?

That’s a fair question. We removed the sentence, also to support shortening the abstract.

1.25-26: the link with runoff and climate models is definitely not obvious. Either to be removed, or expanded

Agreed. We decided to remove this sentence as well.

1.30: I don’t see why having the highest albedo of all natural surfaces is a reason for playing a key role...

We restructured the sentence to clarify our statement:

*“Snow surfaces play a key role in Earth’s radiation budget as their high albedo reflects most of the incoming solar radiation, steering important feedback mechanisms in climate change (Lemke et al., 2007).”*

1.31: “cooling effect” is a bit surprising to read. Snow does not cool the Earth, or at least it depends with respect to what? Ok if you say “more snow-covered surfaces will tend to cool the Earth”

That’s another fair point. Lemke et al. (2007) actually state that because of the high albedo, changes in snow and ice cover are important feedback mechanisms in climate change, mainly manifesting in a strong correlation between snow cover and air temperature. We removed the term “cooling effect”:

*“Snow surfaces play a key role in Earth’s radiation budget as their high albedo reflects most of the incoming solar radiation, steering important feedback mechanisms in climate change (Lemke et al., 2007). Changes in global snow cover are very sensitive to small variations in both air temperatures and the amount of absorbed solar radiation (Di Mauro et al., 2015).”*

l.37: LAPs are not the only reason for snow darkening (or at least albedo decrease). Metamorphism has a similar effect

That's right. We revised the sentence accordingly:

*“One of the main drivers of the decrease in snow cover and albedo is the presence of small light-absorbing particles (LAPs) on snow and ice surfaces (Di Mauro, 2020).”*

l.39: Sun's energy is unclear → where the solar spectrum peaks? Where the sun irradiance is maximum?

Revised for clarification:

*“These particles are mainly absorptive in the visible part of the solar spectrum where the Sun's irradiance is highest, and when present lead to a considerable amount of additionally absorbed radiation.”*

l.59: not clear what “not tied to physical units” means

Agreed, this is not very clear. We wanted to express that these algorithms do not report physical units in terms of quantifying LAP concentration. However, we decided to remove this expression anyhow.

l.61, 62: what are EnMAP, PRISMA?

EnMAP and PRISMA are European spaceborne imaging spectroscopy missions, being in operation for a few years now. We added a few more details:

*“Measurements from the recently launched orbital imaging spectroscopy missions EnMAP and PRISMA have been utilized to conduct preliminary sensitivity analyses and first attempts to estimate dust concentration on snow and ice (Bohn et al., 2021, 2022; Kokhanovsky et al., 2022). These studies concluded though that low amounts of inorganic LAP deposition cannot be detected with remote sensing measurements, which is in line with findings from other studies (e.g., Warren (2013)).”*

l.68: not clear what these references correspond to

They correspond to the two mentioned missions SBG and CHIME. We moved the references for clarity:

*“Future orbital imaging spectroscopy missions, such as NASA's Surface Biology and Geology (SBG) (National Academies of Sciences, Engineering, and Medicine, 2018) and ESA's Copernicus Hyperspectral Imaging Mission for the Environment (CHIME) (Rast et al., 2019) will address this problem by providing high signal-to-noise ratios (SNR) of more than 400 in the visible-to-near-infrared (VNIR) and more than 250 in the shortwave-infrared (SWIR), as well as high spectral and spatial resolution.”*

l.69: absorption spectral features?

We incorporated this suggestion:

*“This will enable the detection and quantification of LAPs by resolving their subtle spectral absorption features even for low concentrations.”*

**1.73: not clear why mapping arid surfaces informs about transport and radiative forcing. EMIT should be more clearly introduced**

Thanks for the comment. We agree that a proper introduction of EMIT was missing and added the following phrases:

*“EMIT is a high performance VNIR-SWIR imaging spectrometer whose prime mission focus is to deliver maps of surface mineralogy and relative abundance of different mineral types from arid dust source regions. These maps will provide improved input to Earth System Models of atmospheric transport and radiative forcing by constraining the composition of regional dust emissions (Connelly et al., 2021).”*

**1.83: the transition from the Lambertian assumption issue to the topography issue is too fast. Is there a link between both?**

Topography causes the surface to behave non-Lambertian as a function of slope and aspect. This adds to the intrinsic directional effects of snow reflectance. We revised this paragraph and provide a more reasonable connection between anisotropy and topography:

*“However, the approach utilizes the surface reflectance as an intermediate non-physical retrieval quantity assuming Lambertian behavior. It is obtained from statistical modeling using constrained priors, impeding a proper consideration of surface topography and anisotropy. This could lead to significant biases in downstream estimates of LAP concentration, and propagate to erroneous calculations of LAP radiative forcing as these physical effects influence both magnitude and shape of measured spectral radiance as a function of local view and solar geometry (Carmon et al., 2023). Specifically, Picard et al. (2020) demonstrated the sensitivity of snow albedo measurements to surface slope based on spectral data taken in the field, and proposed a correction approach to retrieve the intrinsic albedo.”*

**1.89: what does “rapidly shifting terrain” mean?**

We revised this sentence and removed the term “rapidly shifting terrain”:

*“However, given the complex terrain of mountainous regions, and the current unavailability of coincident radar/lidar and imaging spectroscopy data in orbit, reliance on fixed DEMs may introduce additional retrieval errors, not only due to variability in local snow depth, but also because of uncertainties in the DEM product itself (Dozier et al., 2022).”*

**1.91: at first order and satellite footprint scale the mountain topography probably dominates snow depth variability, nope?**

We agree in general that on the satellite footprint scale (> 30 m pixel size) the local topography is the dominant effect rather than variability in snow depth. However, we do not fully understand the intention of this comment and its connection to the respective line in the manuscript. We mean that ‘reliance on fixed DEMs may introduce additional retrieval errors’ not only due to variability in local snow depth, but also because of uncertainties in the DEM product itself. We added this to the text to provide some clarification:

*“However, given the complex terrain of mountainous regions, and the current unavailability of coincident radar/lidar and imaging spectroscopy data in orbit, reliance on fixed DEMs may introduce additional retrieval errors, not only due to variability in local snow depth, but also because of uncertainties in the DEM product itself (Dozier et al., 2022).”*

**I.95: could you explain what does this algorithm**

Sure. We added the following:

*“It simultaneously retrieves atmosphere and surface properties from imaging spectrometer measurements by inverting a wavelength-dependent top-of-atmosphere (TOA) radiance model.”*

**I.96-97: not clear what is the atmospheric radiative code and the snow one. Also it suggests that 3D effects (reillumination by neighboring slopes) are not accounted for by such a model. Do you confirm?**

We use MODTRAN to simulate atmosphere radiative transfer (it actually uses DISORT internally for the calculation of multiple scattering), and DISORT itself for modeling directional snow reflectance. To clarify, we revised:

*“In this work, we introduce a full physics-based characterization of atmosphere and surface by coupling the MODTRAN atmosphere radiative transfer code with the multistream DISORT program. The latter is utilized to simulate directional snow reflectance as a function of biogeophysical properties as well as view and illumination geometry.”*

We confirm that our model does not include adjacency effects from neighboring pixels and slopes. We added this information:

*“We currently exclude the effects of adjacent pixels and slopes both to limit the complexity of our forward model and because their impact on modeled radiance is less critical than the separation of downward direct and diffuse transmittance (Guanter et al., 2009; Picard et al., 2020).”*

**I.123: what tool was used to compute these HDRF?**

We used DISORT to compute snow HDRF. We updated the captions of Figures 1 and 2 and revised:

*“Figure 1 shows HDRF simulated with DISORT as a function of  $\theta_i$  for snow grain radii of 100  $\mu\text{m}$  (panel a) and 1000  $\mu\text{m}$  (panel b).”*

**I.138: it's not obvious to me why the backward reflectance decreases with less direct irradiance (it means comparing backward and side scattering). Some explanation detailing the equivalent incidence angle of diffuse illumination would be helpful**

The scenario shown in Figure 2 does not use a specific incidence angle for the diffuse illumination. We show HDRF for isotropic, hemispheric diffuse illumination and direct irradiance at a specific solar zenith angle. We refer Dr. Libois to Schaepman-Strub et al. (2006), Figures 8-10, which show that HDRF at 30° solar zenith and 0° view zenith angle decreases at

550 nm with increasing diffuse component of illumination. At the same time, Figure 10 in their paper confirms the opposite behavior for illumination angles greater than  $\sim 50^\circ$ , which is shown in Figure 2b of our manuscript as well. The minimum values of HDRF in the visible wavelengths under fully diffuse illumination conditions and nadir view angle is caused by the angular intersection of the strong forward scattering phase function with the surface. We slightly revised the respective paragraph as follows:

*“Figure 2 highlights the sensitivity of HDRF to different fractions of direct solar irradiance and a complementing isotropic, hemispheric diffuse illumination for solar zenith angles of  $0^\circ$  (panel a) and  $80^\circ$  (panel b). Snow surfaces are properly forward scattering, i.e., have a significantly higher reflectance factor in the forward direction than in the backward direction, though only for direct irradiance fractions of  $>80\%$  (Schaepman-Strub et al., 2006). As a consequence, we observe an inverse behavior of HDRF magnitude for the two illumination conditions, particularly in the VIS wavelengths. With smaller amounts of direct irradiance, HDRF decreases at  $\theta_i = 0^\circ$  due to the angular intersection of the forward scattering phase function with the surface (Schaepman-Strub et al., 2006), whereas its values significantly increase at  $\theta_i = 80^\circ$ .”*

**I.141: could you clarify whether “scattering by surrounding objects” can actually be modeled.**

Yes, there exist some attempts to model the “scattering by surrounding objects”. For instance, Picard et al. (2020) developed physical equations to account for both dark and bright reflectance from neighboring pixels. However, they conclude that this theory is ‘complex [...] and requires information or assumptions on the neighbouring slope, which limits its interest in practice’.” For clarification, we added the following sentence to the description of our forward model:

*“We currently exclude the effects of adjacent pixels and slopes both to limit the complexity of our forward model and because their impact on modeled radiance is less critical than the separation of downward direct and diffuse transmittance (Guanter et al., 2009; Picard et al., 2020).”*

**I.144: I regret that EMIT has not been introduced before in more details. In particular its spatial resolution seems to be a critical quantity if it is meant to see independently distinct mountain slopes instead of a mixture of various slopes.**

Yes, we agree that this information is critical and was missing before. We added a more proper description of the EMIT instrument to the introduction:

*“Extending over a wavelength range of 380-2500 nm with a spectral resolution of approximately 7.5 nm, EMIT images provide a pixel size of around 60 m on a 74 km wide swath. The temporal revisit time is variable depending on the orbital cycle of the ISS, and ranges between one day and more than a week (Thompson et al., 2024). After more than a year in operation, EMIT provides data products from many different regions of the Earth, including snow covered high mountains, and experiments have confirmed a remarkably high SNR of more than 500 on average and above 750 in the VNIR wavelengths (Thompson et al., 2024).”*

**I.163: I think units (here and elsewhere) should not be italic**

Revised.

I.172: can you clarify whether you invert independently the individual pixels, or not.

Yes, we invert each individual pixel independently. We added this information:

*“Following Thompson et al. (2018), we combine an atmosphere and surface state in  $\mathbf{x}$ , so that  $\mathbf{x} = [\mathbf{x}_{ATM}, \mathbf{x}_{SURF}]^T$ , and invert each pixel of the image, i.e., each measured radiance spectrum, independently.”*

Eq. (2): I think it could be better explained in terms of the various contributions. Also, transmittance is a physical property (of the atmosphere for instance). Here it seems that it includes the partition between direct and diffuse irradiance. I’d recommend to explicitly mention the direct/diffuse partition. Also, I don’t know what “atmospheric path radiance” is. Is it related to the spherical albedo of the atmosphere? By the way spherical albedo has not been defined before.

Thanks for this comment. Yes, transmittance is a physical property of the atmosphere. That’s how we use it in our forward model to simulate radiance measured at the sensor. And yes, direct and diffuse parts of the downwelling transmittance are scaled differently, so that those two terms represent the partition into direct and diffuse irradiance at the surface. Atmospheric path radiance describes the number of solar photons that are scattered by the atmosphere into the line-of-sight of the sensor without interaction with the surface. It is not related to the spherical albedo of the atmosphere, which is the multiple scattering of photons between the target pixel and the surrounding atmosphere before they enter the line-of-sight of the sensor. We clarified our explanation of the various terms:

*“ $l_0$  is the atmospheric path radiance, i.e., the number of solar photons that are scattered by the atmosphere into the line-of-sight of the sensor without interaction with the surface.  $t_{dir}^\downarrow$ ,  $t_{dif}^\downarrow$ , and  $t^\uparrow$  are direct downwelling, diffuse downwelling, and total upwelling transmittance of the atmosphere. Scaled by two different angles,  $t_{dir}^\downarrow$  and  $t_{dif}^\downarrow$  represent the partition into direct and diffuse irradiance at the surface. Finally,  $s$  is the spherical albedo of the atmosphere, which describes the multiple scattering of photons between the target pixel and the surrounding atmosphere before they enter the line-of-sight of the sensor.”*

I.185: I’d expect the HDRF to depend also on the direct/diffuse partition. Regarding the incidence angle what is the motivation to have it in the state vector instead of using a DEM? How would the results with fixed vs retrieved incidence angle compare?

Yes, that’s absolutely right. The HDRF is also a function of the direct/diffuse partition. We added this for clarification:

*“ $\rho_s$  is the HDRF and a function of  $\mathbf{x}_{SURF}$  that holds snow grain size, liquid water content, algae concentration, and dust mass mixing ratio, as well as of the partition into direct and diffuse irradiance.”*

The motivation of having the incidence angle in the state vector instead of using a DEM is driven by findings of a recent publication from Carmon et al. (2023): using an external DEM is “error-prone since static global digital elevation models do not generally achieve the accuracy required, and even minor mismatches in spatial resolution can introduce significant artifacts in downstream processing. Here we demonstrate that it is possible to estimate topographic parameters directly from spectral data, ensuring perfect physical consistency,

temporal coincidence, and spatial alignment”. We refer Dr. Libois to this manuscript for more details, also regarding the comparison between results with fixed vs. retrieved incidence angle. Our study is focused on including the direct/diffuse irradiance partition and snow reflectance anisotropy in the forward model, rather than investigating the effect of having the incidence angle as a free parameter in the state vector. However, we added a short rationale:

*“In addition, we remove dependency from digital elevation models by adding  $\theta$  to  $\mathbf{x}_{SURF}$ , which ensures "physical consistency, temporal coincidence, and spatial alignment” (Carmon et al., 2023).”*

I.186-187: Not very clear. Do you mean that previously the HDRF was in the surface state vector? Also I’m afraid to read that you assume spherical particles for snow (confirmed I. 198), which are very inappropriate, in particular when it comes to computing HDRF. Database exist for more realistic snow BRDF data (from either measurements or models). If not detailed elsewhere, could you clarify how many snow layers you use in the model.

Yes, that’s correct. The HDRF was previously part of the state vector. In fact, the reflectance values of all instrument channels were being optimized in the former approach. We revised for more clarity:

*“Our approach breaks from previous implementations as we calculate all wavelength-dependent values of  $\rho_s$  by running a combination of Mie scattering theory and the multistream DISORT program (Stamnes et al., 1988) instead of having them as free parameters in the surface state vector.”*

We understand and agree that assuming spherical particles for snow might be inappropriate. However, we actually follow the approach of Grenfell and Warren (1999) and model non-spherical snow particles by a collection of independent spheres that has the same volume-to-surface-area ratio as the non-spherical particles. Several studies have shown that this approach provides an accurate representation of extinction efficiency and single-scattering albedo, while only the scattering asymmetry factor is usually overestimated (Grenfell and Warren, 1999; Neshyba et al., 2003; Grenfell et al., 2005; Warren, 2019). Its effect on bulk optical properties can be compensated though by reducing the grain size of the model (Dang et al., 2016). Nevertheless, more realistic snow BRDF datasets certainly exist, but we would like to defer the testing of various representations of snow and ice optical properties in our retrieval framework to a subsequent study. We consider the current manuscript rather as a concept study for the simultaneous retrieval of atmosphere and physical surface properties directly from at-sensor radiance. In fact, we changed and adjusted both title and narrative of the manuscript, following the suggestions of reviewer #2. In any case, we extended the discussion in Section 5.2, also to accommodate with one of the main comments of Dr. Libois:

*“We apply Mie scattering theory to obtain the ice OPs, and follow the approach of Grenfell and Warren (1999) to model non-spherical snow particles by a collection of independent spheres that has the same volume-to-surface-area ratio as the non-spherical particles. This assumption might be inappropriate, but studies have shown that this approach provides an accurate representation of extinction efficiency and single-scattering albedo, while only the scattering asymmetry factor is usually overestimated (Grenfell and Warren, 1999; Neshyba et al., 2003; Grenfell et al., 2005; Warren, 2019). Its effect on bulk optical properties can be compensated though by reducing the grain size of the model (Dang et al., 2016). Nevertheless, more accurate representations of the optical shape of snow as well as more realistic snow*

*BRDF datasets certainly exist (e.g., see Malinka (2014), Dumont et al. (2021), Malinka (2023)), but we would like to defer the testing of various representations of snow and ice optical properties in our retrieval framework to a subsequent study. We consider the current manuscript rather as a concept study for the simultaneous retrieval of atmosphere and physical surface properties directly from at-sensor radiance. However, we have to be aware of potential misrepresentations in many cases.”*

We’re using 3 horizontal layers for modeling snow reflectance. A small near-surface layer that contains impurities, and two semi-infinite LAP-free snow layers. We added this:

*“We run DISORT with 16 streams and use three horizontal layers for modeling snow HDRF: a small near-surface layer that contains impurities, and two semi-infinite LAP-free snow layers.”*

**I.187: how many streams are used for the DISORT simulations?**

We used 16 streams for our DISORT simulations. Added:

*“We run DISORT with 16 streams and use three horizontal layers for modeling snow HDRF: a small near-surface layer that contains impurities, and two semi-infinite LAP-free snow layers.”*

**I.190: do you mean that the dimension was larger previously due to the multispectral dimension?**

In the previous implementation, the reflectance values of each instrument channel were part of the state vector of free parameters. In case of EMIT,  $\mathbf{x}$  contained 285 surface and 3 atmosphere parameters. The new approach reduces this to 5 and 3, respectively. We added this clarification:

*“While  $\mathbf{x}_{SURF}$  held the reflectance values of each of the 285 EMIT channels in the previous implementation, our approach reduces this number to only 5 parameters (Table 1).”*

**I.197: not only the asymmetry parameter matters, but also the detailed phase function for that kind of applications**

Thanks for the comment! That’s of course right. We added the respective information:

*“Next, we calculate the single-scattering phase functions by decomposing the Henyey–Greenstein phase function, which better captures the actual phase function of snow than the phase function for spheres, into Legendre coefficients for 20 moments (Aoki et al., 2000; Painter and Dozier, 2004a).”*

**I.199: how is then defined the snow grain size? Including the liquid water coating? What about the size distribution of snow particles?**

We define the snow grain size as the diameter or radius of the collection of spheres, excluding the liquid water coating (for details, we refer Dr. Libois to Green et al. (2002)). We don’t include specific assumptions about the size distribution of snow particles, although we agree that it would be important to be considered. This will certainly be part of our subsequent study,



which will be focused on the modeling of snow and ice particles in our retrieval framework. We revised:

*“We assume the snow grains to be shaped as a collection of spheres characterized by a specified radius that equals three times the volume-to-area ratio of the real non-spherical snowpack (Warren, 2019), and apply traditional Mie Theory to obtain their OPs (Grenfell and Warren, 1999). [...] We add the influence of liquid water by modeling OPs of coated spheres for the case of wet snow by adding the width of a circular layer of liquid water to the grain radius (Green et al., 2002).”*

I.204: would you have any reference to support that algae are similar in Greenland and Patagonia? Otherwise why would you believe this? Also could you clarify what optical property is defined. Only a mass absorption coefficient? The same question holds for dust.

These are very important questions, thanks for raising them! We revised the discussion about the choice of LAP optical properties in Section 5.2:

*“To model biological LAPs, we utilize a set of algae OPs for the species *Ancylonema* (glacier algae) as well as *Sanguina nivaloides* and *Chloromonas nivalis* (snow algae), derived from samples collected on the Greenland Ice Sheet (Chevrollier et al., 2022). Despite being characterized at a different geographic location far away from our study site, we assume that these OPs adequately represent algae cells found on ice sheets, glaciers, and snow worldwide. This is corroborated by previous studies that identified those three species as being responsible for the darkening of snow and ice surfaces in various regions, including the Greenland Ice Sheet, Svalbard, the European Alps, and the Sierra Nevada in California (Yallop et al., 2012; Remias et al., 2012; Di Mauro et al., 2020a; Painter et al., 2001). Moreover, Takeuchi & Kohshima (2004) and Kohshima et al. (2007) identified *Ancylonema* and *Chloromonas* algae as among the most frequently encountered species on the Patagonian Ice Sheet.*

*The use of dust OPs poses a different challenge, as they strongly depend on mineralogy and source area (Di Biagio et al., 2019). Several sets of dust OPs from different geographic regions, derived using diverse techniques and data, are publicly available. They have been obtained from any combination of field samples, spectral measurements, and linear mixing modeling, with Sahara, Colorado, Greenland, and Mars being the most prominent regional types (Polashenski et al., 2015; Skiles et al., 2017b; Balkanski et al., 2007, Singh et al., 2016). However, only a few studies have considered specific dust minerals when assessing their impact on snow melt (Lawrence et al., 2010; Kaspari et al., 2014; Reynolds et al., 2014). For our study, we selected only one type of dust OPs representing rather large particles, measured from samples that were collected in the San Juan Mountains of southwestern Colorado (Skiles et al., 2017b). In the lack of dust OP characterization in South America, we believe that the Colorado type is closest to the dust type found in Patagonia. This is especially supported by the finding that very large dust particles are often present in patchy snow of arid environments (Skiles et al., 2017b). Moreover, studies of the geochemical composition and mineralogy suggest that both the San Juan and the Patagonian dust are significantly dominated by quartz with 30-50 % of the total mineral mass (Lawrence et al., 2010; Demasy et al., 2024). Such analyses will be facilitated on even larger geographical scales by the EMIT mission objective, which is providing an improved understanding of the mineralogy of dust particle source regions, and enabling an enhanced identification and classification of dust OPs and their distribution around the Earth's snow-covered areas.”*

We use single-scattering albedo, mass extinction coefficient, and asymmetry parameter as optical properties for LAPs. Essentially, they are the same as for the snow particles and we model the LAP-contaminated snow as a linear mixture of all OPs, as we've mentioned in lines 197-198 and 208 of the initial manuscript submission.

I.213: what do you mean by “atmospheric aerosols”? Those assumed in MODTRAN?

We mean atmospheric aerosols in general, including those assumed in MODTRAN. To our knowledge, almost all atmosphere radiative transfer models treat aerosols as absorptive and/or scattering particles that cause a smooth decrease in reflected photons in the visible part of the solar spectrum.

I.222: it should be clear what measurements are included here. Multi spectral or also multi-pixels?

Good point! Equation 3 is applied on a per-pixel basis, so  $y$  is always one single radiance spectrum measured at the sensor. We clarified this:

*“Following Thompson et al. (2018), we combine an atmosphere and surface state in  $x$ , so that  $x = [x_{ATM}, x_{SURF}]^T$ , and invert each pixel of the image, i.e., each measured radiance spectrum, independently.”*

I.226: then why using a prior at all if in the end it does not constrain the cost function?

The priors are actually not completely flat since we apply light constraints to the parameters in  $x_{ATM}$ , i.e., water vapor, aod, and pressure elevation. We updated with this important information:

*“However, we use only light constraints on the parameters in  $x_{ATM}$ , and uninformative, flat priors for  $x_{SURF}$  by adding large values to the diagonal of  $S_a$ .”*

I.227: for the model to be well-posed it should be proved that measurements at distinct wavelengths are actually independent, and the number of spectral channels should be mentioned (to be compared to the number of parameters to be retrieved).

Yes, good point! We've already mentioned in the initial manuscript that instrument noise is commonly assumed to be uncorrelated between channels (Thompson et al., 2018) (lines 222-223), which underlines the independence of measurements at distinct wavelengths. We revised to add the number of EMIT's spectral channels:

*“Due to the reduced number of only eight state vector parameters and 285 independent measurements from EMIT's spectral channels, the problem is well-posed, in contrast to using previous surface models (Thompson et al., 2018; Bohn et al., 2021; Bohn et al., 2022).”*

Eq. (4): here again this factor is very dependent on the actual phase function of snow, which is likely to be different than that of spheres.

Fully agreed! For this reason, we don't use the phase function for spheres, but the Henyey-Greenstein (HG) phase function. Aoki et al. (2000) have shown that modelled snow HDRF agrees better with measurements in this case. The HG phase function is very smooth, while

that of spheres features ice bow and glory peaks not seen for real snow along with very low sideward scattering (Räsänen et al., 2015). As mentioned before, we added the following:

*“Next, we calculate the single-scattering phase functions by decomposing the Henyey–Greenstein phase function, which better captures the actual phase function of snow than the phase function for spheres, into Legendre coefficients for 20 moments (Aoki et al., 2000; Painter and Dozier, 2004a).”*

**1.230: the main advantage of optimal estimation is to provide an estimation of the posterior error, which is not discussed at all. It would be worth adding this uncertainty range for the retrieved parameters of interest.**

We absolutely agree that providing posterior uncertainties is one of the main advantages of optimal estimation. Our initial submission was more focused on the dependency of the retrieved parameters on topographic and anisotropic effects of the surface than on error estimates given by our OE inversion setup. However, we added the posterior uncertainties, i.e., the square-root of the variance, to each retrieved parameter value in Table 2, and briefly discuss the numbers in a new paragraph:

*“Table 2 also shows posterior uncertainties for each retrieved parameter in standard deviation as reported by the OE framework. Errors are generally low, in particular for quantities exhibiting distinct absorption features in the reflectance spectrum, such as water vapor, grain size, or algae. Higher uncertainties are reported especially for AOD, but also for retrieved dust concentration. It has to be noted though that the linearized posterior error predictions by OE are likely optimistic. OE presumes a linearized version of the forward model, with a local multivariate Gaussian error prediction. This ignores other local minima solutions, if they exist, and even the local estimate may under predict errors (Hobbs et al., 2017; Cressie, 2018). However, the uncertainty estimates provide at least a useful hint whether the variance of retrieved values is reasonable or not.”*

**1.248: I think the units should be like  $W m^{-2}$ .**

Fixed.

**1.264: how do EMIT spatial resolution and SRTM match (or not)? Is SRTM averaged somehow to find incidence angles comparable to EMIT retrievals?**

The spatial resolution of SRTM data is 30 m, so finer than EMIT measurements, which have 60 m pixel size. We averaged four SRTM pixels to get an EMIT-equivalent surface elevation and respective slope and aspect angles. We added this information to the manuscript:

*“The SRTM DEM has a spatial resolution of 30 m, so that we averaged four pixels to get surface elevation, slope, and aspect values that match EMIT's ground sampling distance of 60 m.”*

**1.268: the correlation between snow grain size and slope is tricky. You could either argue that the retrieval is homogeneous for snow grain size in a mountainous terrain with various slopes, suggesting that accounting for slope corrects for an apparent heterogeneity of snow grain size when assuming flat terrain. Or you give a physical reason why snow grain size can differ**

depending on the slope... Looking at the correlations between retrieved parameters may help clarify this point. A too strong correlation may indicate compensation between both variables.

Thanks for this comment! We agree that this correlation is tricky. We discuss it in a few paragraphs of the initial submission of the manuscript. We mention that a higher amount of direct illumination on sun-facing slopes could potentially induce melting processes leading to larger grain sizes due to clustering, but doesn't necessarily need to (lines 266-268). Figure 8a gives an indication for a potential correlation between slope and grain size by plotting the difference in assumed incident angles to the difference in retrieved grain size. It's not a strong correlation, but it's somewhat present. In addition, we point to Figures 1, 2, and 5, which confirm that the anisotropy of snow reflectance causes changing shape and magnitude of HDRF as a function of increasing grain size all along the solar spectrum. Hence, varying ratios of direct to diffuse illumination as a consequence of erroneously assumed local solar zenith angles could lead to errors in derived snow grain size (lines 333-336).

1.271: I would not necessarily say that snow grains of 200 microns (at least if it is the radius) are small.

We agree and removed the respective words.

Fig.7: it should be clear somewhere that EMIT L2A is the standard EMIT product ignoring topography

Absolutely right! We added the following phrases:

*"We also show corresponding spectra from the EMIT L2A product. They were retrieved by applying the same OE technique, but without considering topography in the forward model, and by obtaining HDRF from statistical modeling using constrained priors instead of utilizing a snow surface radiative transfer model."*

1.299: it is not clear what the single-transmittance model is (what wavelength?).

Thanks for raising this point. We understand that we haven't defined this term. We updated the caption of Figure 7:

*"For comparison, panels (a) and (c) are complemented by results from the EMIT L2A product, which assumes  $\theta_i = \theta_0$ , i.e., uses a single downward transmittance term (direct + diffuse) in the forward model (called single-transmittance model hereinafter)."*

1.303: I think this "hook" behavior should be better identified in the figure. Is it the too strong decrease in the blue visible in the HDRF? I believe the direct/diffuse partition, that greatly changes in this spectral range, if not properly accounted for can also contribute to this hook.

Yes, the "hook" is the strong decrease in HDRF in the visible blue wavelengths. We added some more explanation:

*"The assumed direct illumination and direct to diffuse ratio are consequently too small, leading to higher reflectance due to more photons reaching the instrument, and causing a red-shift in HDRF and the formation of a downward hook, which is identified as a strong decrease in HDRF in the VIS blue wavelengths below 500 nm."*

Absolutely, the direct/diffuse partition significantly contributes to the formation of the hook, if not properly accounted for. This is exactly what we mean by saying ‘The assumed direct illumination and direct to diffuse ratio are consequently too small, ...’ in lines 301-302 of the initial manuscript submission. We can only change this ratio by assuming different incident angles for direct and diffuse illumination.

I.311: I don’t see in this paragraph the sensitivity to assuming a Lambertian snow surface. Unless both impacts are combined altogether. In this case it would be worth separating both to disentangle the impacts, and point what assumptions is most critical.

Good point! The term ‘assumption of a Lambertian surface’ doesn’t really fit here. We removed it.

I.325: only here is the direct/diffuse partition explicitly mentioned, while I think it would be valuable to clarify its treatment and impact earlier on.

Agreed and revised by adding some clarification to the description of our forward model:

*“ $t_{dir}^{\downarrow}$ ,  $t_{dif}^{\downarrow}$ , and  $t^{\uparrow}$  are direct downwelling, diffuse downwelling, and total upwelling transmittance of the atmosphere. Scaled by two different angles,  $t_{dir}^{\downarrow}$  and  $t_{dif}^{\downarrow}$  represent the partition into direct and diffuse irradiance at the surface.”*

I.333: the 3 digits may be a lot for such an estimation.

Agreed and reduced to one digit.

Table 2: any comment on the fact that algae can be zero somewhere, and present elsewhere?

To estimate algae concentration, our retrieval is sensitive to their distinct absorption features caused by, e.g., carotenoid and chlorophyll. If those features are not present or only very weakly expressed in the HDRF, the framework reports very close to zero numbers. This happened in cases S1-S3 and I1, so that we decided to put a zero number in Table 2. However, we addressed this issue by adding the posterior uncertainties to each retrieved state vector parameter. The variances in the posterior covariance matrix are never exactly equal to zero, so that the estimated posterior mean isn’t actually zero either if we enclose it by its variance.

I.375: “small” is awkward. Preliminary?

Right, we recognize that this is indeed a strange formulation. Revised accordingly.

I.376: this point suggests that there could be correlations between the retrieved parameters. You could look at these correlations to inform about the independence (or not) of the retrieved parameters, which is trivial with optimal estimation. The underlying question being for instance: can the retrieval algorithm return stronger AOD and lower LAP in snow, which may result in more or less the same apparent radiance at TOA?

Thanks for this comment! That’s a very good suggestion. We calculated the error covariance matrix for the retrieved parameters from the image of the Chilean ice field following Govaerts et al. (2010), and added this result to Section 4.2.2 as Figure 9, including a new paragraph:

*“Another way of assessing the sensitivity of retrieved parameters is to look at their error correlation. OE provides a measure of retrieval uncertainty for each state vector element in terms of a posterior covariance matrix, which can be normalized to an error correlation matrix (Rodgers, 2000; Govaerts et al., 2010). We calculated this matrix from the retrieval maps for the Chilean ice field for both atmosphere and surface properties (Fig. 9). The coefficients confirm the findings from Fig. 8 by showing a slight negative correlation between  $\theta_i$  and grain size, a slight positive correlation between  $\theta_i$  and dust, and no correlations between the assumed incident angle and both liquid water and algae. We observe expected anticorrelation between pressure elevation and both AOD and water vapor, and identify an overall disentanglement between surface and atmosphere parameters. Only exceptions are  $\theta_i$ , being an input to both atmosphere and surface model, and AOD, which features a negative correlation with dust LAPs.  $\theta_i$ , or more precisely, the assumed ratio of direct to diffuse irradiance, dust, and atmospheric aerosols cause a very similar shape of reflectance in the visible wavelengths, leading to potential ambiguities between them.”*

In addition, we added some of these findings to Section 4.2.4 about the blue wavelengths:

*“Our selection of AOD for the comparison is supported by the findings from Fig. 9, which show a negative correlation between AOD and both  $\theta_i$  and dust. In other words, the retrieval could bare the risk of compensating for a biased AOD by altering the other two parameters and vice versa.”*

And:

*“In contrast, variations in AOD can not compensate for erroneously assumed  $\theta_i$ , which supports the conclusion that the anticorrelation between the two properties is rather one-sided, and a correct assumption or retrieval of the incident angle is more important than a proper characterization of atmospheric aerosols.”*

The calculated error correlation coefficients indeed show a negative correlation between AOD and dust as well as AOD and the local incident angle, so that there’s a certain risk that the retrieval returns stronger AOD and lower dust, resulting in the same modeled apparent radiance.

**1.382: this suggests that AOD cannot be accurately retrieved, unless it is the blue end of the spectrum that puts most constraint on AOD (rather than the longer wavelengths). Could you expand on that?**

Yes, sure. The estimation of AOD has traditionally been a particular challenge since most algorithms use strong assumptions about scene content, or shadowed pixels that may be absent at coarse ground sampling. Thompson et al. (2018) suggest that jointly estimating atmospheric state and the surface reflectance spectrum can make better use of the information in the VSWIR interval, i.e., facilitate a more accurate retrieval of AOD. However, it’s still heavily dependent on the aerosol optical properties as defined within the utilized atmosphere radiative transfer model. We might circumvent this at least to a certain degree by being able to accurately retrieve the local incident angle directly from the measured radiance, as shown by Carmon et al. (2023) and confirmed by our manuscript. This adds one constraint to the shape of the reflectance in the blue wavelengths, potentially facilitating a more reliable retrieval of AOD. In any case, we need to investigate this in more detail in subsequent studies. We added this discussion to Section 4.2.4:

*“In contrast, variations in AOD can not compensate for erroneously assumed  $\theta$ , which supports the conclusion that the anticorrelation between the two properties is rather one-sided, and a correct assumption or retrieval of the incident angle is more important than a proper characterization of atmospheric aerosols. The latter has traditionally been a particular challenge since most algorithms use strong assumptions about specific scene content that may be absent at coarse ground sampling distance. Thompson et al. (2018) suggest that jointly estimating atmospheric state and the surface reflectance spectrum can make better use of the information in the VSWIR interval, i.e., facilitate a more accurate retrieval of AOD. However, it is still heavily dependent on the aerosol optical properties as defined within the utilized atmosphere radiative transfer model. Being able to accurately retrieve the local incident angle directly from the measured radiance, as shown by Carmon et al. (2023) and confirmed by our manuscript, adds one constraint to the shape of the reflectance in the blue wavelengths, potentially facilitating a more reliable retrieval of AOD.”*

### 1.395: AOT or AOD?

AOD. That was a typo. Fixed.

### 1.399: what would be the impact of not considering blue wavelengths in the retrievals? What variables would be most affected, and to which extent?

Not considering blue wavelengths in the retrieval would impede the estimation of aerosol properties, but especially of inorganic LAP in snow, such as dust or black carbon. The slope of HDRF in the shortest wavelengths provides an important hint about the concentration of dust. The retrieval of AOD is difficult anyhow, but we show in our manuscript that we can leverage the blue wavelengths to accurately estimate the local incident angle, which facilitates a more reliable retrieval of AOD. Without the blue part of the spectrum, the difference in the ratio of direct to diffuse irradiance would be less prominent, impeding a correct estimation of  $\theta$ . We added this discussion to Section 5.1:

*“Alternatively, one could exclude blue wavelengths from the retrieval, but it would impede the estimation of aerosol properties and inorganic LAP in snow. The slope of HDRF in the shortest wavelengths provides an important hint about the concentration of dust. The retrieval of AOD is difficult anyhow, but we show in our manuscript that we can leverage the blue wavelengths to accurately estimate the local incident angle, which facilitates a more reliable retrieval of AOD. Without the blue part of the spectrum, the difference in the ratio of direct to diffuse irradiance would be less prominent, impeding a correct estimation of  $\theta$ .”*

### 1.401: this physical explanation for the blue hook could have been given earlier on, and a bit more detailed.

Thanks for this comment! We recognized that our statement is actually incorrect. The blue-shift in reflectance is actually induced by a too high assumed direct portion of incoming light (red-shift in irradiance) and is expressed by the formation of an upward hook in the shortest wavelengths. In contrast, the downward hook in the blue wavelengths is caused by a too high assumed diffuse portion of incoming light (blue-shift in irradiance), leading to a red-shift in reflectance. More details are already given in Section 4.2.1 of the initial manuscript submission (lines 292-295 and lines 301-305). We now provide a more comprehensive physical explanation earlier in the manuscript:

*“Likewise, the assumed ratio of direct to diffuse irradiance is too large, which compensates for present LAP absorption in the VIS wavelengths. Overall, this leads to a blue-shift in HDRF and is expressed by an upward hook in the shortest wavelengths.”*

And:

*“The assumed direct illumination and direct to diffuse ratio are consequently too small, leading to higher reflectance due to more photons reaching the instrument, and causing a red-shift in HDRF and the formation of a downward hook, which is identified as a strong decrease in HDRF in the VIS blue wavelengths below 500 nm.”*

I.402: can you expand on these laboratory measurements?

We recognized that we actually don't have any sound prove of this statement and thus, removed it.

I.411: where does this assumption come from?

The assumption about the value of peak radiance originates from various tests we ran during the preparation of the manuscript. However, as we didn't include a more detailed derivation, we removed it and added a reference that illustrates the difficulties of calibrating the blue wavelength range in imaging spectroscopy:

*“Saturation and non-linearity effects in sensor radiometry, which occur over very bright surfaces such as snow (Helmlinger et al., 2016).”*

I.412: you could also refer to Picard et al. (2016) who suggest absorption is in between Warren and Brandt (2008) and Warren (1984).

Added accordingly:

*“For instance, the imaginary part of the refractive index as presented by Warren (1984) indicates more ice absorption in the shortest blue wavelengths than the updated index in Warren and Brandt (2008), while Picard et al. (2016) suggest that the magnitude of absorption lies in-between the two.”*

I.423: on which basis do you argue that the spherical assumption is the best general shape? As a suggestion, Malinka (2014, 2023) has developed a general mixture model that works very well to estimate the “optical shape” of snow. Maybe it's relevant as well for snow BRDF. See also Dumont et al. (2021).

Thanks for this comment! We recognize that arguing that the spherical assumption provides the best general shape is tricky and doesn't have a sound basis. We removed this statement and significantly revised the paragraph presenting the discussion of snow optical properties:

*“We apply Mie scattering theory to obtain the ice OPs, and follow the approach of Grenfell and Warren (1999) to model non-spherical snow particles by a collection of independent spheres that has the same volume-to-surface-area ratio as the non-spherical particles. This assumption might be inappropriate, but studies have shown that this approach provides an accurate representation of extinction efficiency and single-scattering albedo, while only the*



*scattering asymmetry factor is usually overestimated (Grenfell and Warren, 1999; Neshyba et al., 2003; Grenfell et al., 2005; Warren, 2019). Its effect on bulk optical properties can be compensated though by reducing the grain size of the model (Dang et al., 2016). Nevertheless, more accurate representations of the optical shape of snow as well as more realistic snow BRDF datasets certainly exist (e.g., see Malinka (2014), Dumont et al. (2021), Malinka (2023)), but we would like to defer the testing of various representations of snow and ice optical properties in our retrieval framework to a subsequent study. We consider the current manuscript rather as a concept study for the simultaneous retrieval of atmosphere and physical surface properties directly from at-sensor radiance. However, we have to be aware of potential misrepresentations in many cases.”*

**1.426: much larger than what? Why couldn't it be large spherical particles?**

Fair point. We decided to remove this phrase and provide a more plausible rationale:

*“The grains on bare ice surfaces typically appear to be arbitrarily shaped with irregular dimensions, so that, e.g., a Geometric Optics approach based on ray-tracing would be more appropriate to model their OPs (Kokhanovsky and Zege, 2004; Cook et al., 2020; Bohn et al., 2022).”*

**1.427: It's definitely a good idea, and I would strongly suggest to further investigate this in the present paper.**

We absolutely agree! However, we believe that this would go beyond the scope of our manuscript, which we rather consider to be a concept study for the simultaneous retrieval of atmosphere and physical surface properties directly from at-sensor radiance. As mentioned before, we changed and adjusted both title and narrative of the manuscript, following the suggestions of reviewer #2. At least, we now clearly point out that future work needs to and will follow:

*“In future work, we need to compare retrieval results from assuming different grain shapes, including spheres, spheroids, hexagonal plates, and Koch snowflakes (He et al., 2017; Hao et al., 2023). We will also apply different approaches to model ice layers, e.g., with enclosed air bubbles and a Fresnel layer between the ice and a thin snow cover (Whicker et al., 2022).”*

**1.430: I guess one of the EMIT objectives is to map this variability in dust optical properties, so it might be worth referring to this and directly related studies.**

That's correct. We expanded a little bit on that:

*“Such analyses will be facilitated on even larger geographical scales by the EMIT mission objective, which is providing an improved understanding of the mineralogy of dust particle source regions, and enabling an enhanced identification and classification of dust OPs and their distribution around the Earth's snow-covered areas (Connelly et al., 2021, Goncalves Ageitos et al., 2023).”*

**1.442: as the spatial resolution has never been discussed it's hard to guess how critical are these mixed pixels.**

Fair point. Information about EMIT's spatial resolution is now added:

*“Extending over a wavelength range of 380-2500 nm with a spectral resolution of approximately 7.5 nm, EMIT images provide a pixel size of around 60 m on a 74 km wide swath. The temporal revisit time is variable depending on the orbital cycle of the ISS, and ranges between one day and more than a week (Thompson et al., 2024).”*

**I.453: how would you calculate snow fractional cover? By including it in the state vector?**

Yes, that would be the optimal way of doing it. However, while extremely important, this is a non-trivial problem and would require some extensive future work. We slightly revised our phrase:

*“A more sophisticated alternative would be to calculate snow fractional cover by including it in the state vector, and use a respective minimum value as constraint.”*

**I.471: the link between this work and melt runoff and climate model input are not clear, but this might be clarified if it sounds important to the authors.**

We agree and removed the mention of this link.

#### References:

Aoki, T., Fukabori, M., Hachikubo, A., Tachibana, Y., and Nishio, F.: Effects of snow physical parameters on spectral albedo and bidirectional reflectance of snow surface, *Journal of Geophysical Research: Atmospheres*, 105, 10 219–10 236, <https://doi.org/10.1029/2003JD003506>, 2000.

Connelly, D. S., Thompson, D. R., Mahowald, N. M., Li, L., Carmon, N., Okin, G. S., and Green, R. O.: The EMIT mission information yield for mineral dust radiative forcing, *Remote Sensing of Environment*, 258, <https://doi.org/10.1017/jog.2022.64>, 2021.

Cressie, N.: Mission CO2ntrol: A Statistical Scientist’s Role in Remote Sensing of Atmospheric Carbon Dioxide, *Journal of the American Statistical Association*, 113, 152–168, <https://doi.org/10.1080/01621459.2017.1419136>, 2018.

Dang, C., Fu, Q., and Warren, S. G.: Effect of snow grain shape on snow albedo, *J. Atmos. Sci.*, 73, 3573–3583, <https://doi.org/10.1175/JAS-D-15-0276.1>, 2016.

Demasy, C., Boye, M., Lai, B., Burckel, P., Feng, Y., Losno, R., Borensztajn, S., and Besson, P.: Iron dissolution from Patagonian dust in the Southern Ocean: under present and future conditions, *Frontiers in Marine Science*, 11, <https://doi.org/10.3389/fmars.2024.1363088>, 2024.

Di Biagio, C., Formenti, P., Balkanski, Y., Caponi, L., Cazaunau, M., Pangui, E., Journet, E., Nowak, S., Andreae, M. O., Kandler, K., Saeed, T., Piketh, S., Seibert, D., Williams, E., and Doussin, J.-F.: Complex refractive indices and single-scattering albedo of global dust aerosols in the shortwave spectrum and relationship to size and iron content, *Atmospheric Chemistry and Physics*, 19, 15 503–15 531, <https://doi.org/10.5194/acp-19-15503-2019>, 2019.

Di Mauro, B., Baccolo, G., Garzonio, R., Giardino, C., Massabò, D., Piazzalunga, A., Rossini, M., and Colombo, R.: Impact of impurities and cryoconite on the optical properties of the Morteratsch Glacier (Swiss Alps), *The Cryosphere*, 11, 2393–2409, <https://doi.org/10.5194/tc-11-2393-2017>, 2017.

Donahue, C. P., Menounos, B., Viner, N., Skiles, S. M., Beffort, S., Denouden, T., Arriola, S. G., White, R., and Heathfield, D.: Bridging the gap between airborne and spaceborne imaging spectroscopy for mountain glacier surface property retrievals, *Remote Sensing of Environment*, 299, <https://doi.org/10.1016/j.rse.2023.113849>, 2023.

Gonçalves Ageitos, M., Obiso, V., Miller, R. L., Jorba, O., Klose, M., Dawson, M., Balkanski, Y., Perlwitz, J., Basart, S., Tomaso, E. D., Escribano, J., Macchia, F., Montané, G., Mahowald, N. M., Green, R. O., Thompson, D. R., and García-Pando, C. P.: Modeling dust mineralogical composition: sensitivity to soil mineralogy atlases and their expected climate impacts, *Atmospheric Chemistry and Physics*, 23, 8623–8657, <https://doi.org/10.5194/acp-23-8623-2023>, 2023, 2023.

Govaerts, Y. M., Wagner, S., Lattanzio, A., and Watts, P.: Joint retrieval of surface reflectance and aerosol optical depth from MSG/SEVIRI observations with an optimal estimation approach: 1. Theory, *Journal of Geophysical Research: Atmospheres*, 115, D02 203, <https://doi.org/10.1029/2009JD011779>, 2010.

Grenfell, T. C., Neshyba, S. P., and Warren, S. G.: Representation of a nonspherical ice particle by a collection of independent spheres for scattering and absorption of radiation: 3. Hollow columns and plates, *Journal of Geophysical Research: Atmospheres*, 110, <https://doi.org/10.1029/2005JD005811>, 2005.

Guanter, L., Richter, R., and Kaufmann, H.: On the application of the MODTRAN4 atmospheric radiative transfer code to optical remote sensing, *International Journal of Remote Sensing*, 30, 1407–1424, <https://doi.org/10.1080/01431160802438555>, 2009.

Helmlinger, M., Eastwood, M., Green, R. O., and Thompson, D. R.: Solar-similar near-infrared suppressed “Blue” calibration source, *IEEE Aerospace Conference*, pp. 1–11, <https://doi.org/10.1109/AERO.2016.7500714>, 2016.

Hobbs, J., Braverman, A., Cressie, N., Granat, R., and Gunson, M.: Simulation-Based Uncertainty Quantification for Estimating Atmospheric CO<sub>2</sub> from Satellite Data, *International Journal for Uncertainty Quantification*, 5, 956–985, <https://doi.org/10.1137/16M1060765>, 2017.

Kaspari, S., Painter, T. H., Gysel, M., Skiles, S. M., and Schwikowski, M.: Seasonal and elevational variations of black carbon and dust in snow and ice in the Solu-Khumbu, Nepal and estimated radiative forcings, *Atmospheric Chemistry and Physics*, 14, 8089–8103, <https://doi.org/10.5194/acp-14-8089-2014>, 2014.

Kokhanovsky, A. A. and Zege, E. P.: Scattering optics of snow, *Applied Optics*, 43, 1589–1602, <https://doi.org/10.1364/AO.43.001589>, 2004.

Kohshima, S., Takeuchi, N., Uetake, J., Shiraiwa, T., Uemura, R., Yoshida, N., Matoba, S., and Godoi, M. A.: Estimation of net accumulation rate at a Patagonian glacier by ice core

analyses using snow algae, *Global and Planetary Change*, 59, 236–244, <https://doi.org/10.1016/j.gloplacha.2006.11.014>, 2007.

Lawrence, C. R., Painter, T. H., Landry, C. C., and Neff, J. C.: Contemporary geochemical composition and flux of aeolian dust to the San Juan Mountains, Colorado, United States, *Journal of Geophysical Research: Biogeosciences*, 115, <https://doi.org/10.1029/2009JG001077>, 2010.

Neshyba, S. P., Grenfell, T. C., and Warren, S. G.: Representation of a nonspherical ice particle by a collection of independent spheres for scattering and absorption of radiation: 2. Hexagonal columns and plates, *Journal of Geophysical Research: Atmospheres*, 108, <https://doi.org/10.1029/2002JD003302>, 2003.

Remias, D., Holzinger, A., Aigner, S., and Lütz, C.: Ecophysiology and ultrastructure of *Ancyronema nordenskiöldii* (Zygnematales, Streptophyta), causing brown ice on glaciers in Svalbard (high arctic), *Polar Biology*, 35, 899–908, <https://doi.org/10.1007/s00300-011-1135-6>, 2012.

Reynolds, R. L., Goldstein, H. L., Bryant, B. M. M. A. C., Skiles, S. M., Kokaly, R. F., Flagg, C. B., Yauk, K., Berquó, T., Breit, G., Ketterer, M., Fernandez, D., Miller, M. E., and Painter, T. H.: Composition of dust deposited to snow cover in the Wasatch Range (Utah, USA): Controls on radiative properties of snow cover and comparison to some dust-source sediments, *Aeolian Research*, 15, 73–90, <https://doi.org/10.1016/j.aeolia.2013.08.001>, 2014.

Räisänen, P., Kokhanovsky, A., Guyot, G., Jourdan, O., and Nousiainen, T.: Parameterization of single-scattering properties of snow, *The Cryosphere*, 9, 1277–1301, <https://doi.org/10.5194/tc-9-1277-2015>, 2015.

Takeuchi, N. and Kohshima, S.: A Snow Algal Community on Tyndall Glacier in the Southern Patagonia Icefield, Chile, *Arctic, Antarctic, and Alpine Research*, 36, 92–99, [https://doi.org/10.1657/1523-0430\(2004\)036\[0092:ASACOT\]2.0.CO;2](https://doi.org/10.1657/1523-0430(2004)036[0092:ASACOT]2.0.CO;2), 2004.

Warren, S. G.: Optical properties of snow and ice, *Phil. Trans. R. Soc. A*, 337, <https://doi.org/10.1098/rsta.2018.0161>, 2019.

Yallop, M. L., Anesio, A. M., Perkins, R. G., Cook, J. M., Telling, J., Fagan, D., MacFarlane, J., Stibal, M., Barker, G., Bellas, C., Hodson, A., Tranter, M., Wadham, J., and Roberts, N. W.: Photophysiology and albedo-changing potential of the ice algal community on the surface of the Greenland ice sheet, *ISME J.*, 6, 2302–2313, <https://doi.org/10.1038/ismej.2012.107>, 2012.
